# Supplementary material
Source: bioRxiv or medRxiv preprint supplement (https://www.biorxiv.org/highwire/filestream/107717/field_highwire_adjunct_files/0/355669-1.pdf)
Supplement: Supplementary file [file 355669-1.pdf]

1 Extended data figures and tables

Extended Data Fig. 1

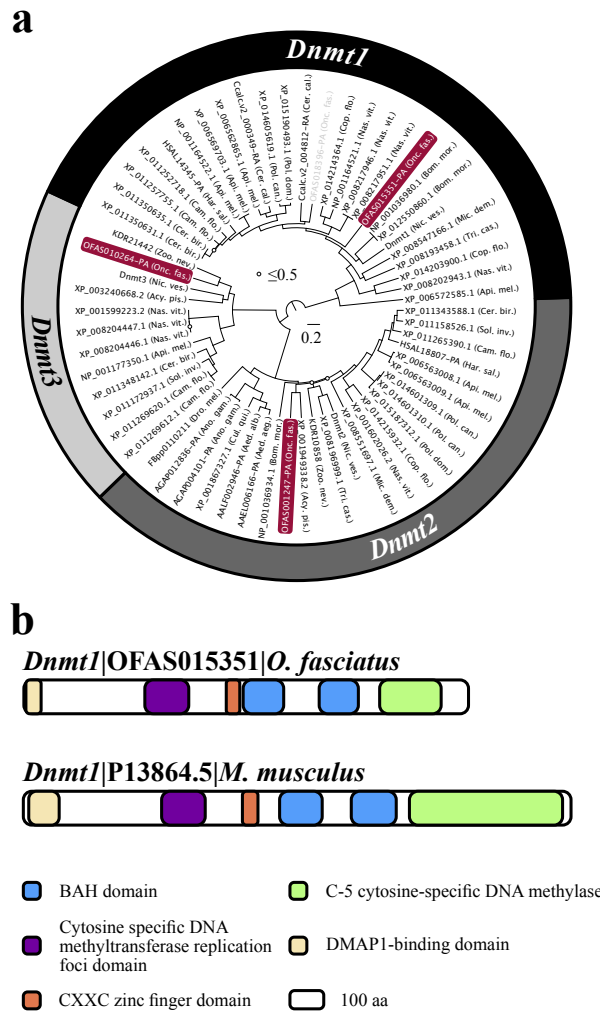

2 **Extended Data Fig. 1 Identification of *O. fasciatus* DNA methyltransferases.** **a**,  
3 Phylogenetic relationship of DNA methyltransferases identified the *de novo* (*Dnmt3*) and  
4 maintenance (*Dnmt1*) DNA methyltransferase in *O. fasciatus*. Node support with  $\leq 0.5$   
5 posterior probability is indicated – other nodes are  $\geq 0.95$ . Branch lengths are in amino  
6 acid substitutions per site. Species names are represented as abbreviations: Acy. pis.:  
7 *Acyrtosiphon pisum*, Aed. aeg.: *Aedes aegypti*, Aed. alb.: *Aedes albopictus*, Ano. gam.:  
8 *Anopheles gambiae*, Api. mel.: *A. mellifera*, Bom. mor.: *Bo. mori*, Cam. flo.:  
9 *Camponotus floridanus*, Cop. flo.: *Copidosoma floridanum*, Cul. qui.: *Culex pipiens*  
10 *quinquefasciatus*, Dro. mel.: *Drosophila melanogaster*, Har. sal.: *Harpegnathos saltator*,  
11 Mic. dem.: *Microplitis demolitor*, Nas. vit.: *Nasonia vitripennis*, Nic. ves.: *Nicrophorus*  
12 *vespilloides*, Onc. fas.: *O. fasciatus*, Cer. bir.: *Ooceraea (Cerapachys) biroi*, Pol. can.:  
13 *Polistes canadensis*, Pol. dom.: *Polistes dominula*, Sol. inv.: *Solenopsis invicta*, Tri. cas.:  
14 *Tribolium castaneum*, and Zoo. nev.: *Z. nevadensis*. **b**, A to scale representation of  
15 *Dnmt1* and protein domains identified in *O. fasciatus* and *M. musculus*.

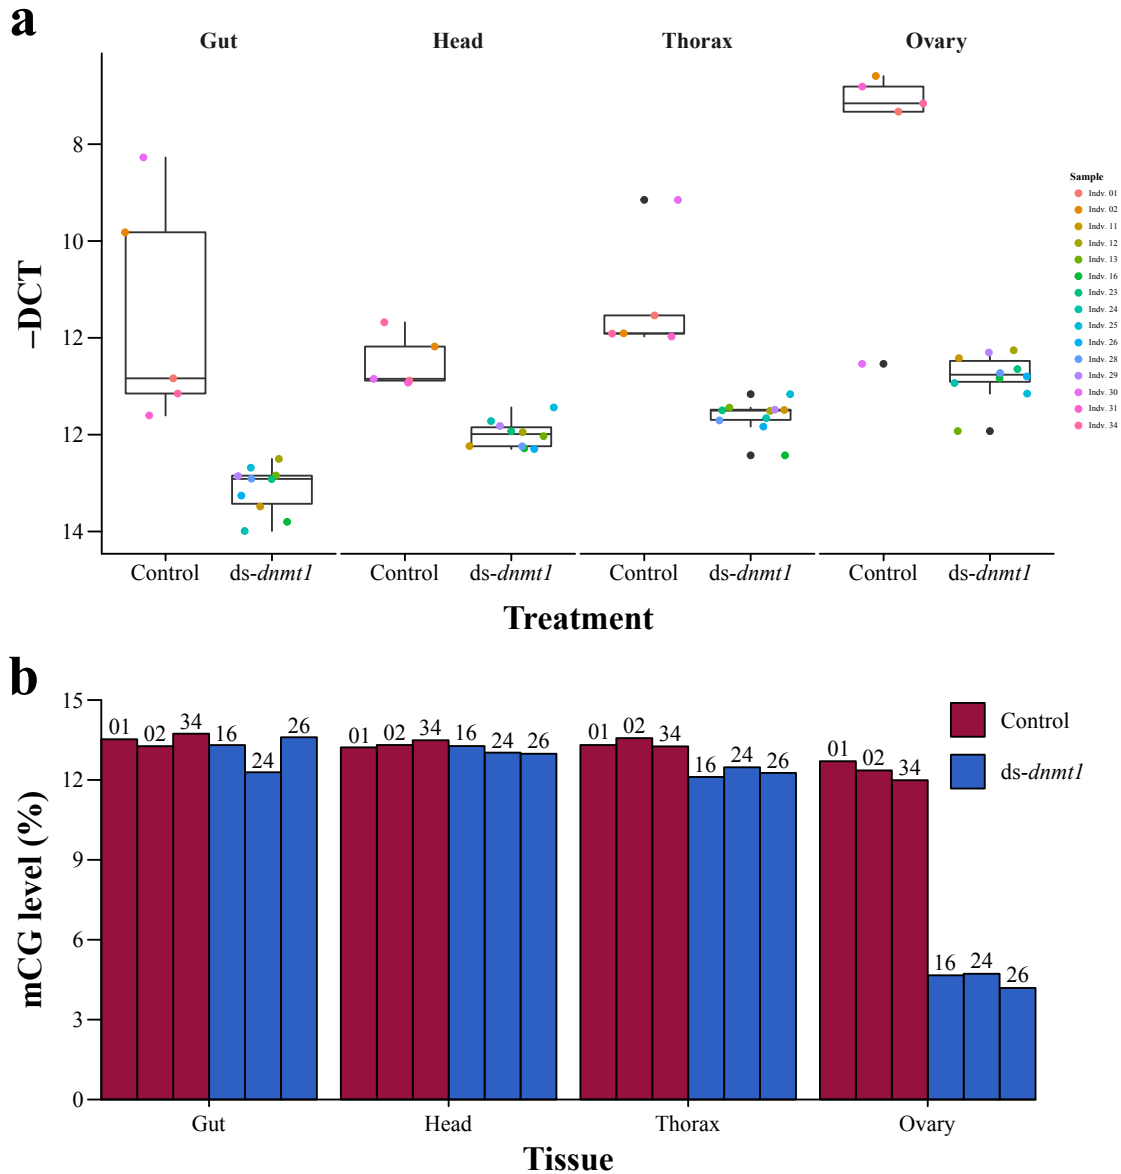

16

17

18

19

20

21

22

**Extended Data Fig. 2 DNA methylation consequences following post-transcriptional knockdown of *Dnmt1* are restricted to ovaries.** **a**, Assessment of RNAi treatment targeting *Dnmt1* using qRT-PCR demonstrates successful reduction in transcription compared to control across all tissues sampled. Colored dots indicate independent biological replicates. **b**, Genome-wide CG methylation level across tissues sampled. Numbers at the top of each bar corresponds to independent biological replicates.

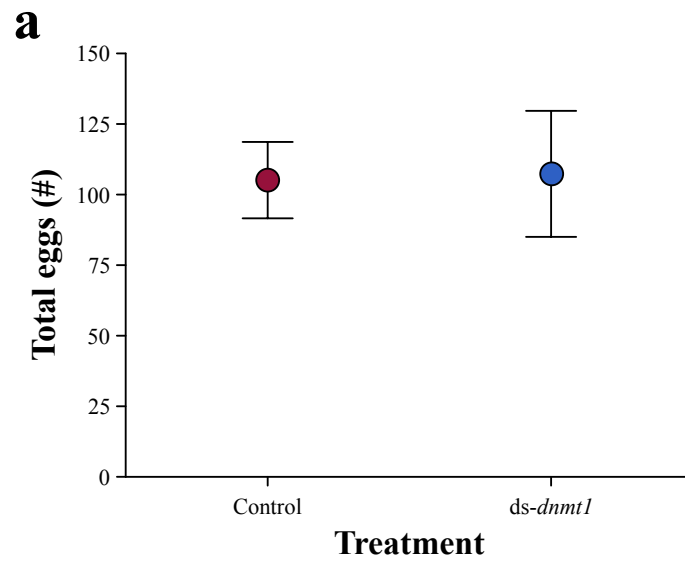

23

24 **Extended Data Fig. 3 Eggs laid in *O. fasciatus* ds-dnmt1 and control females. a,**

25 Number of eggs laid by ds-dnmt1 and control females 8-days post-injection. Dots

26 indicate mean expression level, and error bars indicate standard error of the mean.

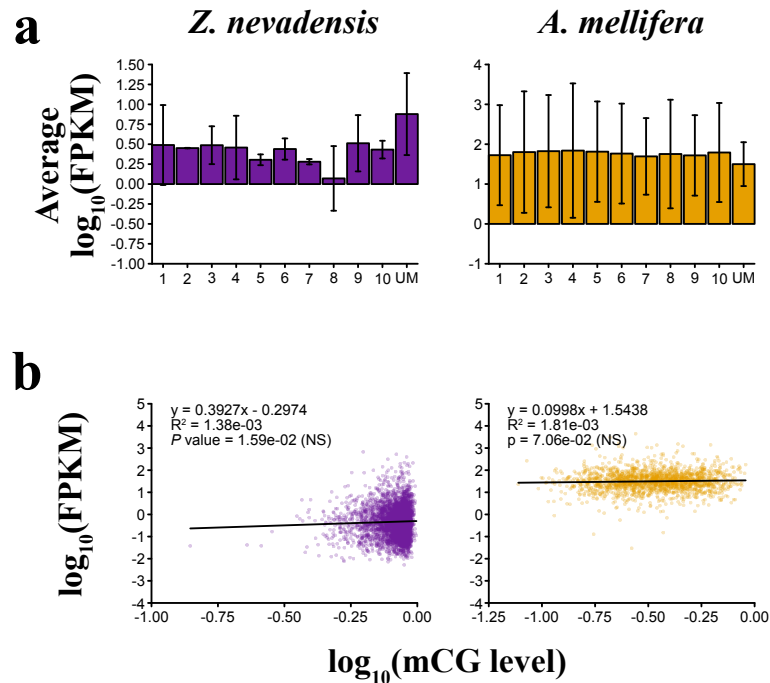

27

28 **Extended Data Fig. 4 mCG in *A. mellifera* and *Z. nevadensis* is not associated with**  
 29 **transcription. a**, Gene expression level for deciles of increasing mCG (1–10) and un-  
 30 methylated genes (UM). Error bars represent 95% confidence interval of the mean. **b**,  
 31 Regression of gene expression against a continuous measure of mCG among all genes  
 32 with >0 FPKM and weighted mCG. Raw *P* values are provided for each regression, and  
 33 significance (S) or non-significance (NS) is indicated in brackets following Bonferroni  
 34 correction.

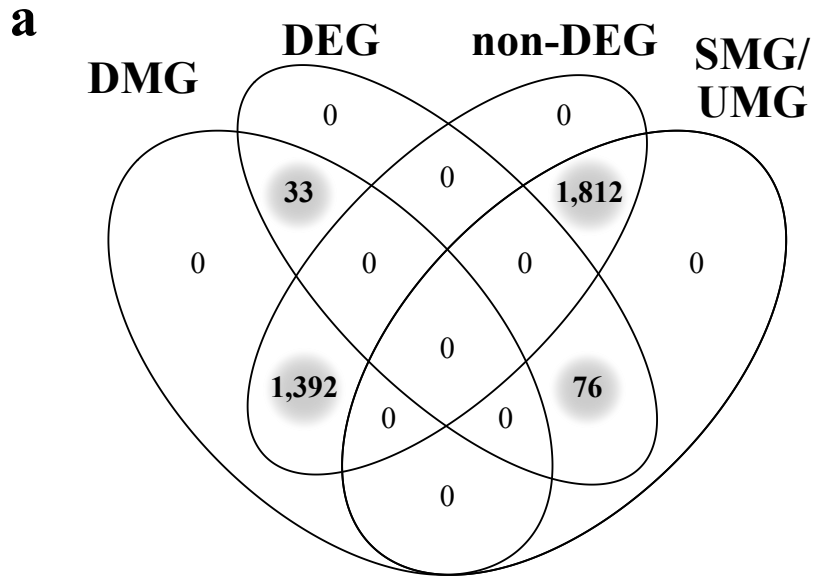

35  
 36 **Extended Data Fig. 5 Loss of mCG in *O. fasciatus* ovaries has a limited effect on**  
 37 **transcription. a**, Combinational overlap of genes that are differential CG-methylated and  
 38 expressed, and similarly CG-methylated and expressed between *O. fasciatus* ds-*dnmt1*  
 39 and control. Gene groups: Differentially Methylated Gene (DMG), Differentially  
 40 Expressed Gene (DEG), Similarly Methylated Gene (SMG)/UnMethylated Genes  
 41 (UMG), and non-Differentially Expressed Gene (non-DEG). More stringent thresholds  
 42 were used to group genes as CG-methylated or unmethylated (see **Methods**).  
 43

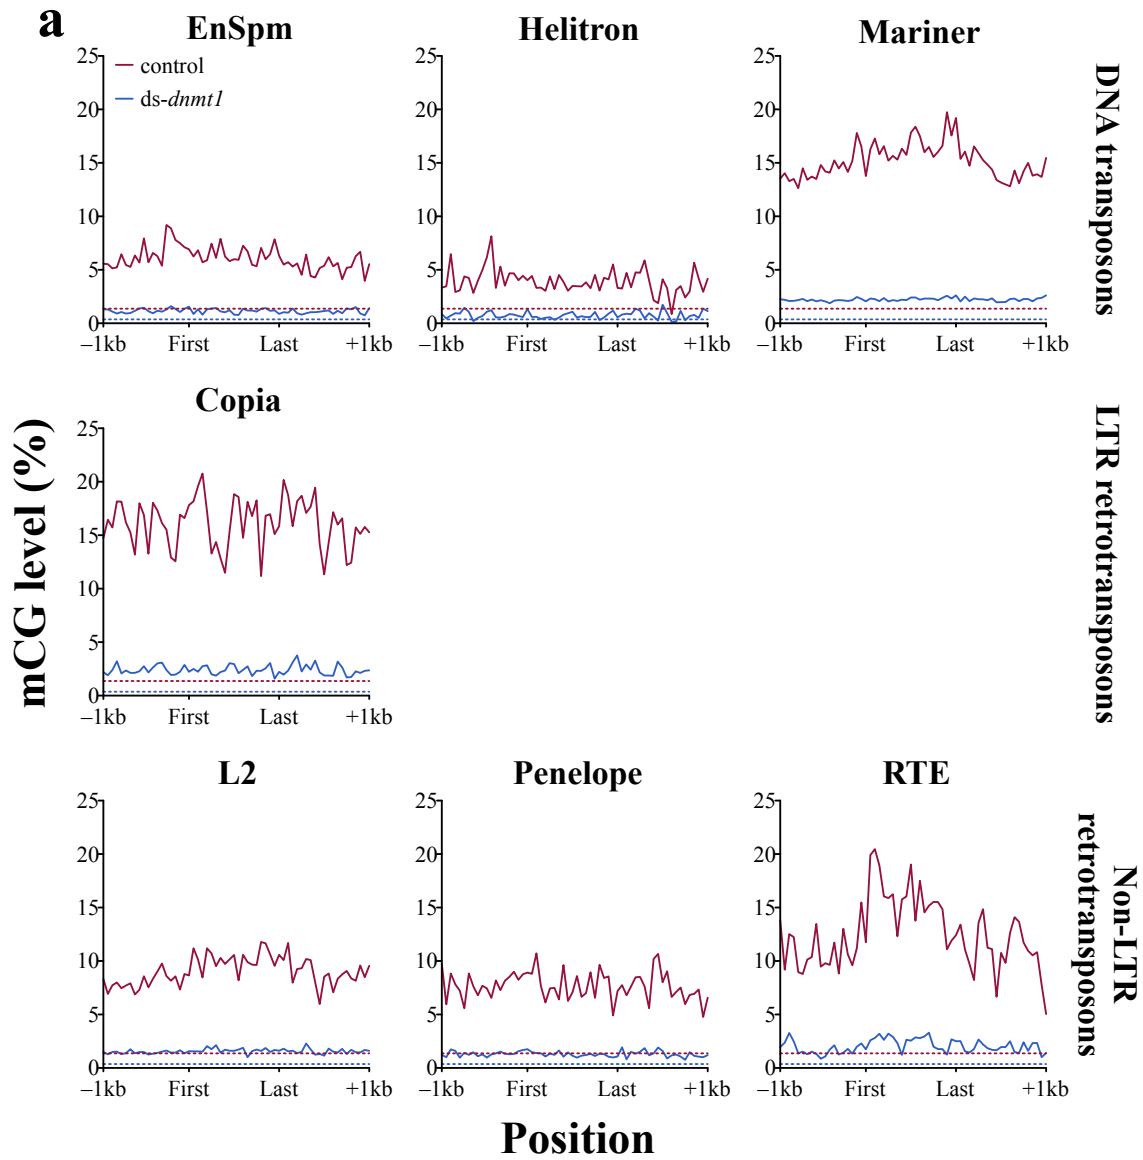

44

45 **Extended Data Fig. 6 DNA methylation of TEs in *O. fasciatus*.** a, Levels of mCG

46

across the bodies and 1kb flanking sequence of different annotated TEs in *O. fasciatus*.

47 **Extended Data Table 1 PCR primers used to validate the presence of a single *Dnmt1***  
 48 **ortholog in the *O. fasciatus* genome.**

| Primer name      | Primer sequence (5' to 3') |
|------------------|----------------------------|
| Of_DMNT1-1_3603S | TGGTATTTTACAAGCTGGAAATTAT  |
| Of_DNMT1-2_424A  | TAGCAACACACTTGCGAATTCT     |
| Of_DNMT1-2_465A  | ATCAGTTATCATTTTTTCTTCA     |
| Of_DNMT1-2_1S    | ATGTCAGATCTTCCTGAAATCAGGA  |

49  
50

51 **Extended Data Table 2 Primer sequences for use in producing template DNA for**  
 52 **use in the MegaScript transcription kit to generate double stranded RNAs for**  
 53 **injection and for quantitative real-time PCR to assess expression levels of *Dnmt1*.**

| Primer                                                                                         | Sequence (5' to 3')                             |
|------------------------------------------------------------------------------------------------|-------------------------------------------------|
| <b>Parental RNAi primer sequences</b>                                                          |                                                 |
| <b>PCR primers to produce <i>Dnmt1</i> templates for transcription of sense RNA strand</b>     |                                                 |
| SENSE + T7                                                                                     | taatacgaactactataggagaTGATGCTCGGCCTCAAAACAAGAT  |
| ANTIENSENSE                                                                                    | ACTCCAGGAGGTGGAACAGTAGTCT                       |
| <b>PCR primers to produce <i>Dnmt1</i> templates for transcription of antisense RNA strand</b> |                                                 |
| SENSE                                                                                          | TGATGCTCGGCCTCAAAACAAGAT                        |
| ANTIENSENSE + T7                                                                               | taatacgaactactataggagaACTCCAGGAGGTGGAACAGTAGTCT |
| <b>PCR primers to produce <i>Red</i> templates for transcription of sense RNA strand</b>       |                                                 |
| SENSE + T7                                                                                     | taatacgaactactataggagaCGAATTGGGCCCGACGTCGCA     |
| ANTIENSENSE                                                                                    | TTCAGCTTCAGGCCTTGTGGAT                          |
| <b>PCR primers to produce <i>Red</i> templates for transcription of antisense RNA strand</b>   |                                                 |
| SENSE                                                                                          | CGAATTGGGCCCGACGTCGCA                           |
| ANTIENSENSE + T7                                                                               | taatacgaactactataggagaTTCAGCTTCAGGCCTTGTGGAT    |
| <b>Quantitative Real-Time PCR primers</b>                                                      |                                                 |
| <i>Dnmt1</i> forward                                                                           | TGTGGTGTGTTGTAAGCCTGT                           |
| <i>Dnmt1</i> reverse                                                                           | GGTGTGTAGGTGTTGCTGG                             |
| Actin forward                                                                                  | CTGTCTCCCGAAAAGAGAATATG                         |
| Actin reverse                                                                                  | TCTGTATGGATTGGAGGATCTA                          |
| GAPDH forward                                                                                  | ACGGTTCAAGGAGAAGTTAG                            |
| GAPDH reverse                                                                                  | ACGGTTCAAGGAGAAGTTAG                            |

54  
55

56 **Extended Data Table 3 Overlap between *O. fasciatus* (control) CG-methylated and**  
 57 **unmethylated genes in none and  $\geq 1$  other insect species used in this study.**

| Number of species (N) | CG methylated in <i>O. fasciatus</i> (control) and N species | Unmethylated in <i>O. fasciatus</i> (control) and N species |
|-----------------------|--------------------------------------------------------------|-------------------------------------------------------------|
| 0                     | 913                                                          | 516                                                         |
| 1                     | 1515                                                         | 1677                                                        |
| 2                     | 2029                                                         | 1848                                                        |
| 3                     | 1581                                                         | 1796                                                        |
| 4                     | 479                                                          | 1755                                                        |
| 5                     | 1                                                            | 563                                                         |

58  
59

60 **Extended Data Table 4 Significance (*P* value) of TE expression between ds-*dnmt1***  
 61 **and control tissues.**

| Transposable element | Ovary 1  | Ovary 2  | Gut      | Head     | Thorax   |
|----------------------|----------|----------|----------|----------|----------|
| Chapeav              | 5.00E-01 | 1.00E+00 | 1.00E+00 | 1.00E+00 | 2.49E-01 |
| Copia                | 5.00E-01 | 6.92E-01 | 3.55E-01 | 3.15E-01 | 8.23E-01 |
| EnSpm                | 5.00E-01 | 5.88E-01 | 6.52E-01 | 1.47E-01 | 8.17E-01 |
| Gypsy                | 5.00E-01 | 7.00E-01 | 5.00E-01 | 3.92E-01 | 7.29E-01 |
| Helitron             | 5.00E-01 | 9.46E-01 | 7.84E-01 | 9.95E-01 | 9.86E-01 |
| Jockey               | 5.00E-01 | 8.64E-01 | 7.84E-01 | 7.53E-01 | 1.00E+00 |
| L2                   | 5.00E-01 | 7.08E-01 | 6.16E-01 | 6.41E-01 | 3.53E-01 |
| Mariner              | 5.00E-01 | 4.83E-01 | 1.00E+00 | 1.00E+00 | 1.00E+00 |
| Penelope             | 5.00E-01 | 4.41E-01 | 2.99E-01 | 8.48E-01 | 7.18E-01 |
| RTE                  | 5.00E-01 | 4.27E-01 | 5.78E-01 | 4.58E-01 | 5.06E-01 |

62  
63
